# Supplementary material for: CTC-mRNA (AR-V7) Analysis from Blood Samples—Impact of Blood Collection Tube and Storage Time
Source: PubMed Central journal article supplement (PMC5454959; doi:10.3390/ijms18051047), 2017-05-12
Supplement: ijms-18-01047-s001.pdf [file ijms-18-01047-s001.pdf]

## Spiked samples

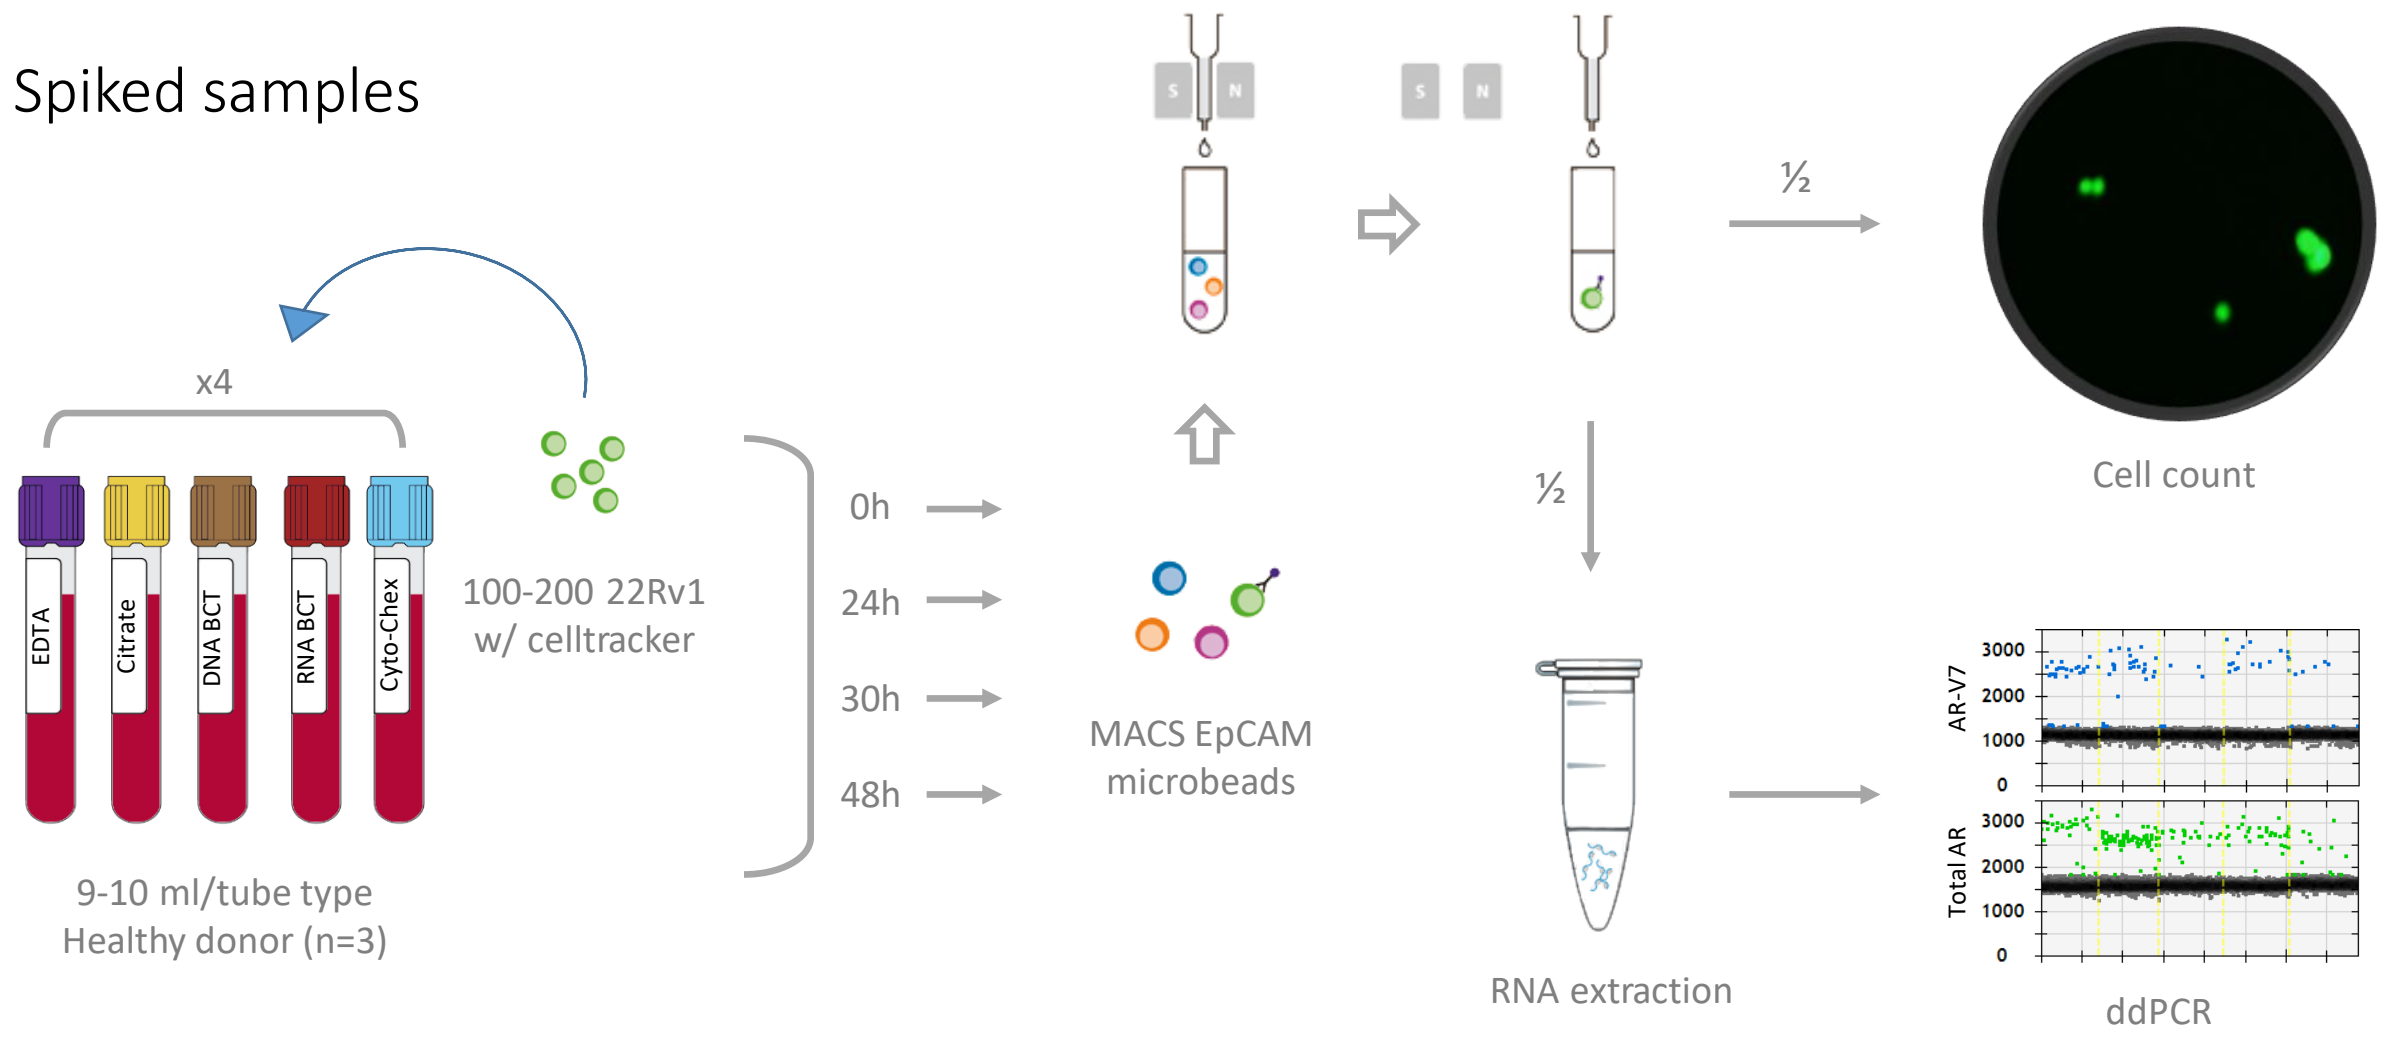

Draw blood

Spike cells

Immunomagnetic enrichment

Recovery analysis

## Increased Proteinase K treatment

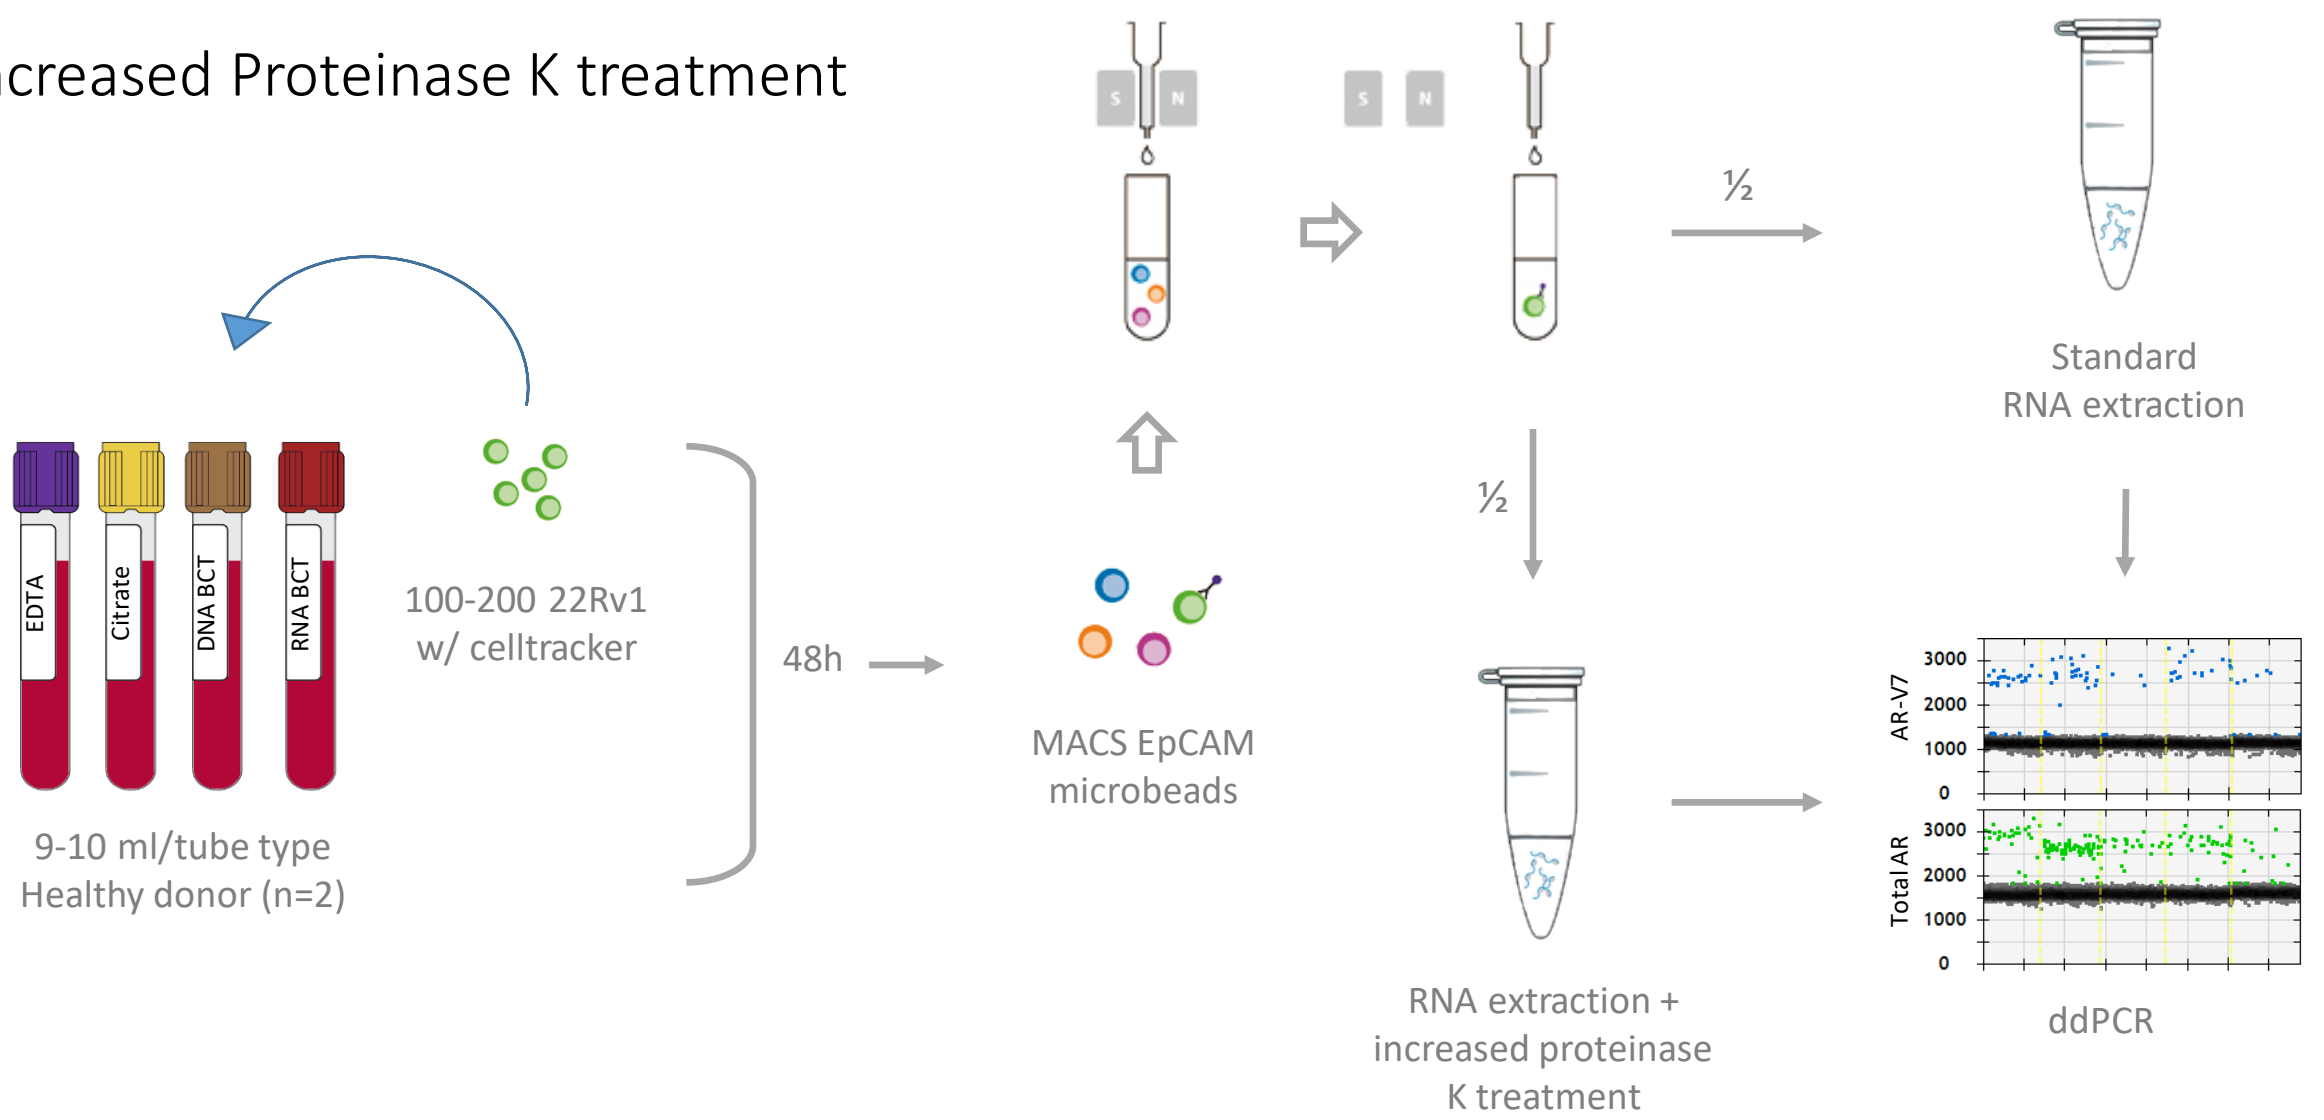

Draw blood

Spike cells

Immunomagnetic enrichment

Recovery analysis

## Patient samples

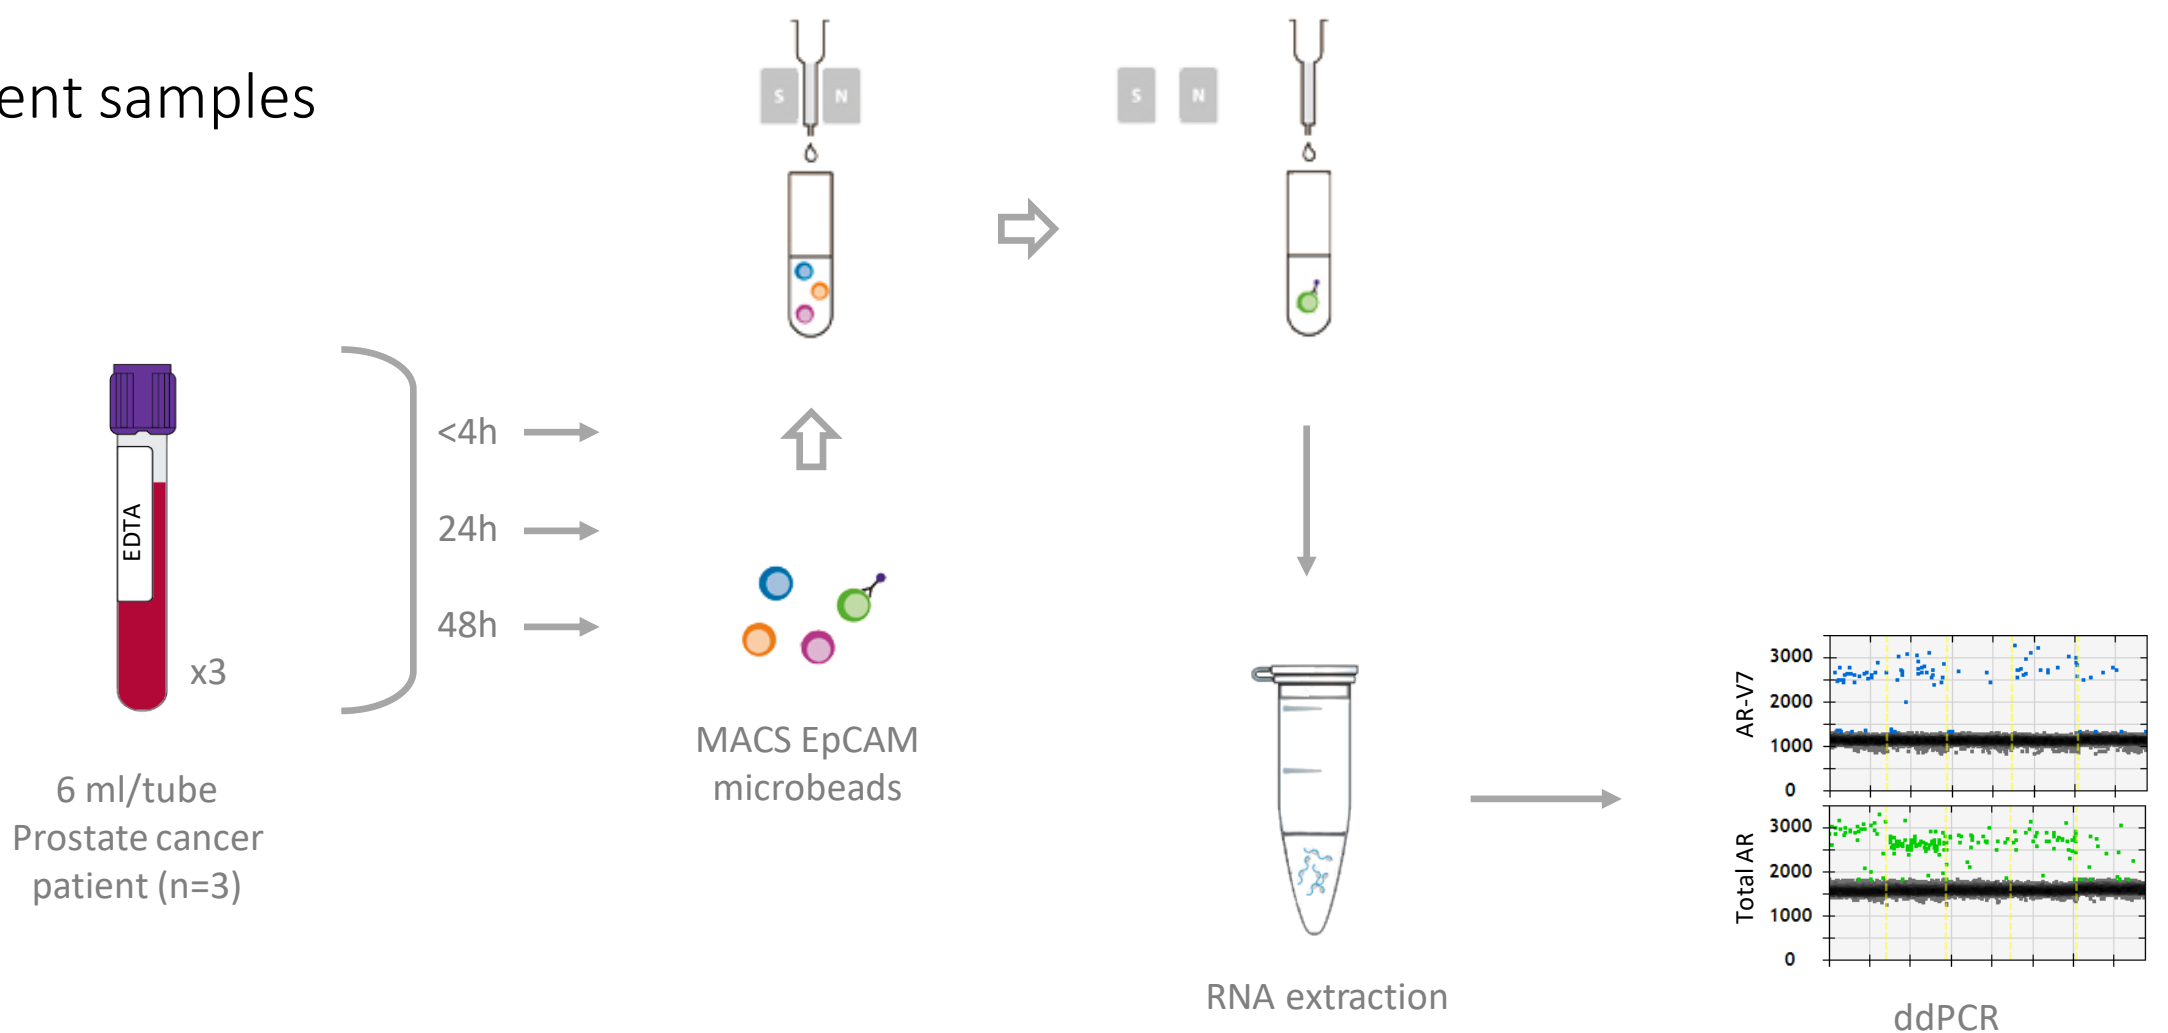

Draw blood

Immunomagnetic enrichment

CTC analysis
